# Supplementary material for: The miR-33a-5p/CROT axis mediates ovarian cancer cell behaviors and chemoresistance via the regulation of the TGF-β signal pathway
Source: PubMed Central journal article supplement (PMC9478117; doi:10.3389/fendo.2022.950345), 2022-09-02
Supplement: DataSheet_1.pdf [file DataSheet_1.pdf]

**SUPPLEMENTARY FIGURES:**

Figure S1

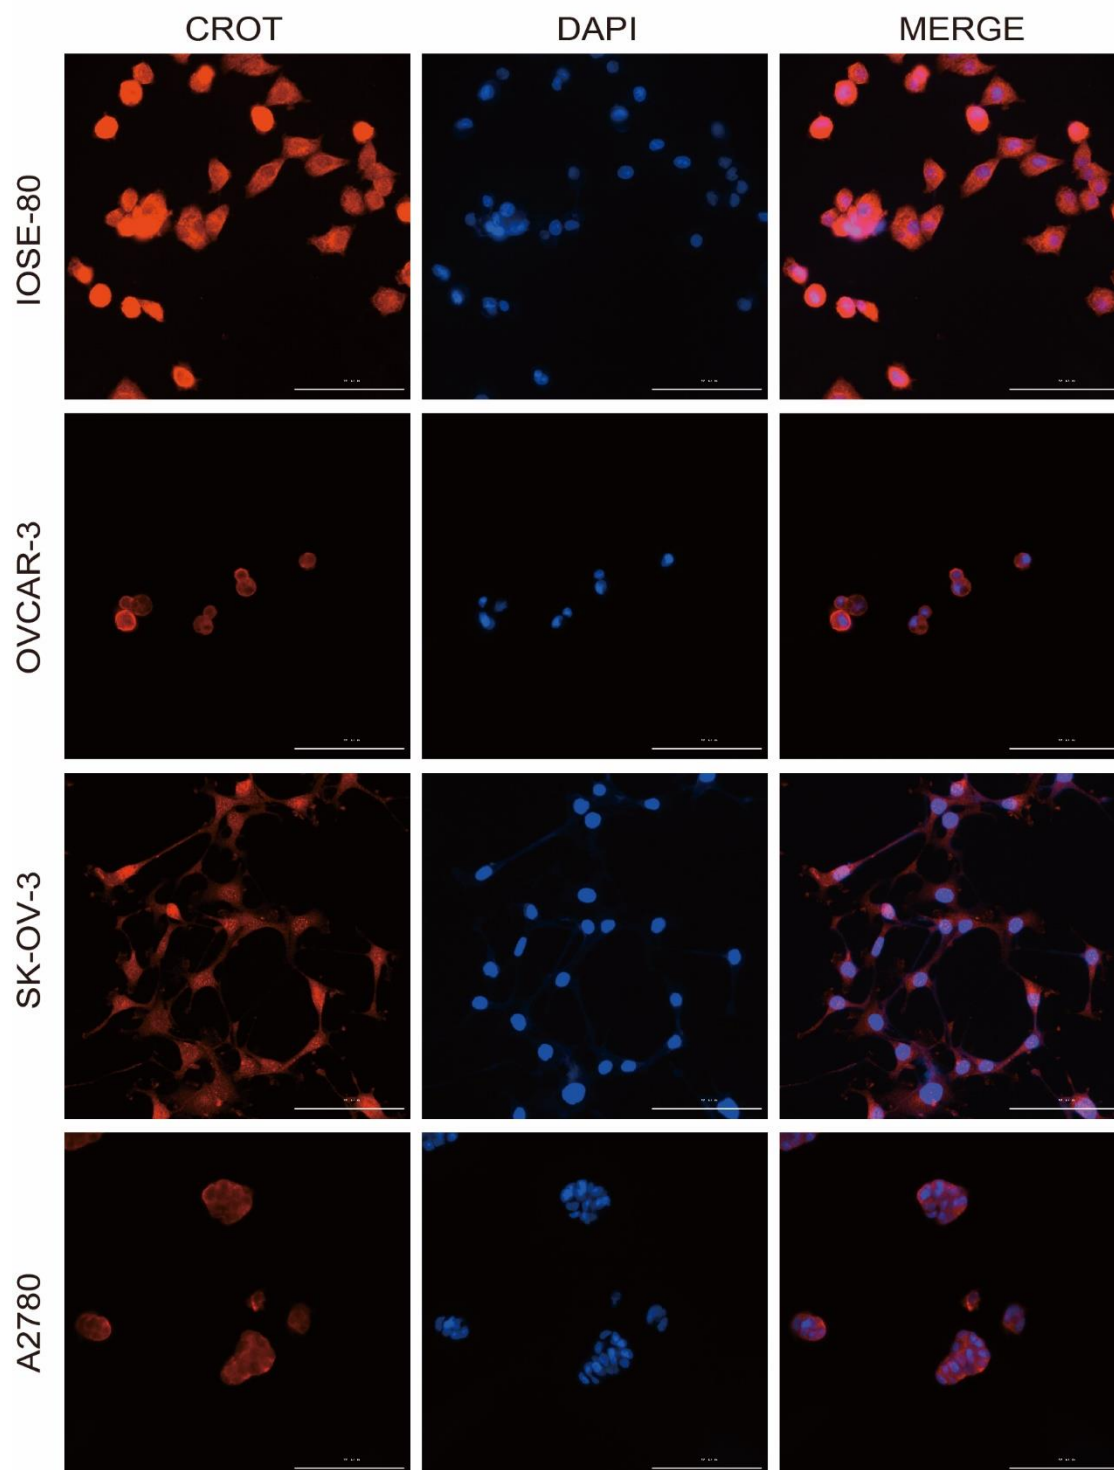

**FIGURE S1** | Representative images of CROT in immortalized ovarian surface epithelium cell lines-80 (IOSE-80) and epithelial ovarian cancer cell lines (OVCAR-3, SK-OV-3, and A2780) by immunofluorescence. Original magnification,  $\times 400$ ; Scale bar, 100  $\mu\text{m}$ .



**FIGURE S2** | GO term and KEGG enrichment analyses of CROT in OC. **(A)** GO term annotation of biological processes (BP). **(B)** GO term annotation of cellular components (CC) based on the data from GSE63885. **(C)** GO term annotation of molecular function (MF) analysis. **(D)**. Kyoto Encyclopedia of Genes and Genomes (KEGG) analysis of co-expression genes with CROT. The data were acquired from the GSE63885 dataset.

Figure S3

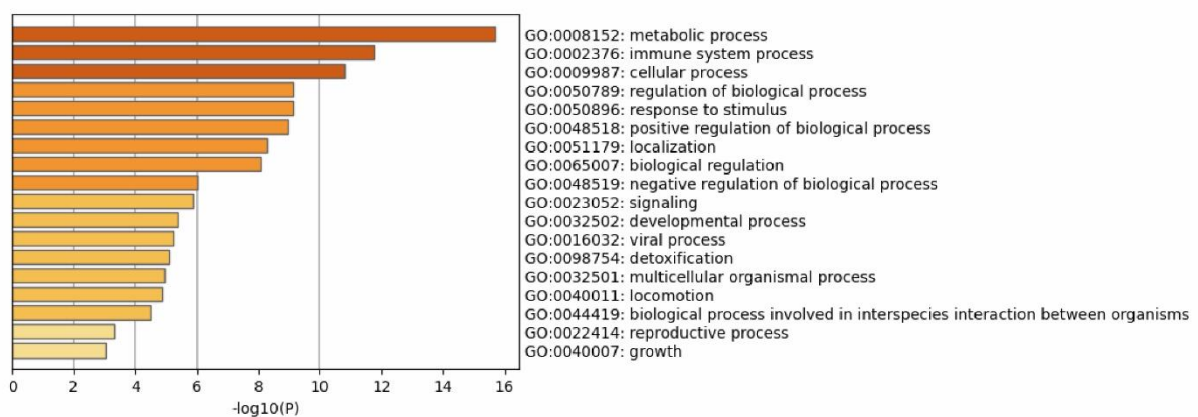

**FIGURE S3** | Metascape analysis of co-expression genes with CROT. The data were acquired from the GSE26712 dataset (<https://metascape.org/gp/index.html#/main/step1>).

Figure S4

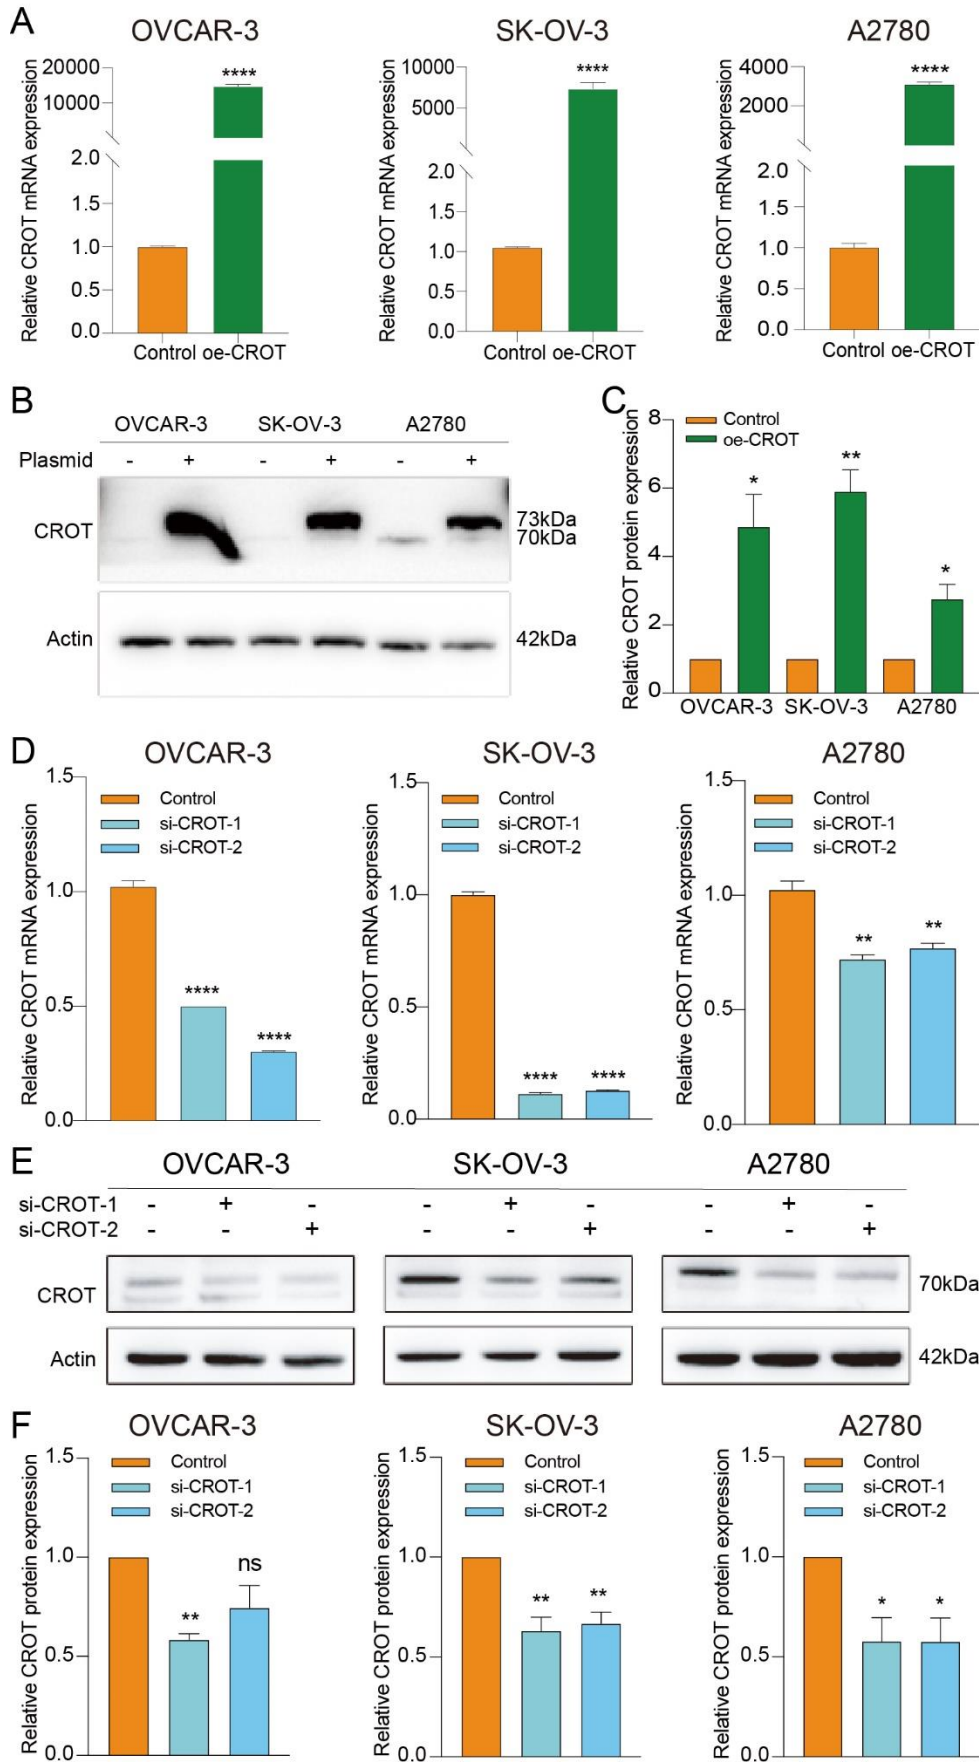



**FIGURE S4** | Detection of CROT mRNA and protein expression by qRT-PCR and Western blot. **(A-C)** Expression of CROT mRNA and protein in OVACR-3, SK-OV-3, and A2780 cells after CROT-overexpressing plasmid (oe-CROT) transfection for 48 h. **(D-F)** Expression of CROT mRNA and protein detected in OVACR-3, SK-OV-3, and A2780 cells after CROT-siRNAs (si-CROT) transfection for 48 h. Assays were repeated at least three times. Data were presented as mean  $\pm$  SEM. \*,  $P < 0.05$ ; \*\*,  $P < 0.01$ ; \*\*\*\*,  $P < 0.0001$ ; ns, not significant.

Figure S5

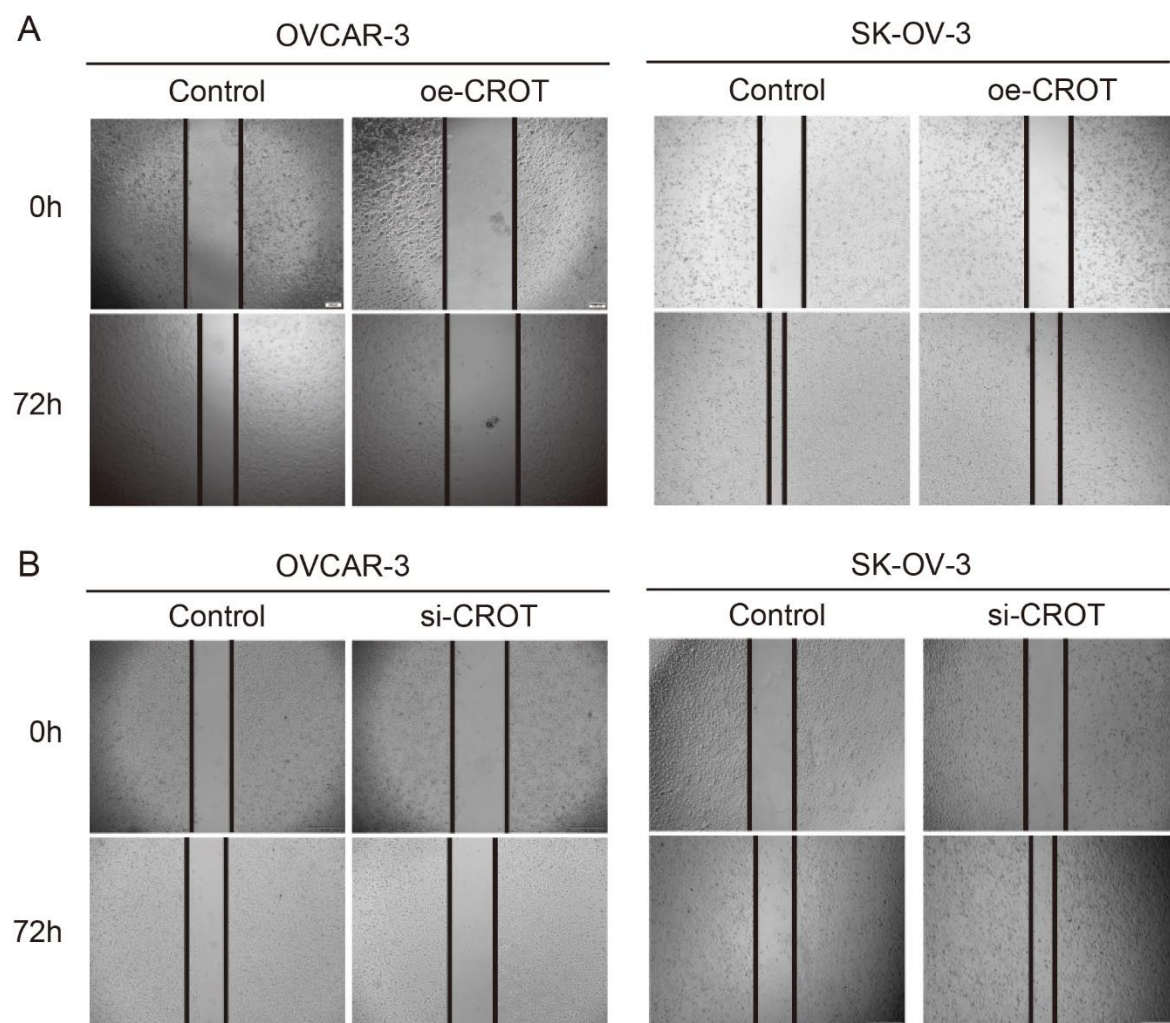

**FIGURE S5** | Detection of cell migration by the wound healing assay. **(A)** Measurement of wound healing in OVCAR-3 and SK-OV-3 cells after CROT-overexpressing plasmid (oe-CROT) transfection for 0 and 72 h. **(B)** Measurement of wound healing in OVCAR-3 and SK-OV-3 cells after CROT-siRNAs (si-CROT) transfection for 0 and 72 h. Negative controls were compared. Scale bar, 100  $\mu$ m.

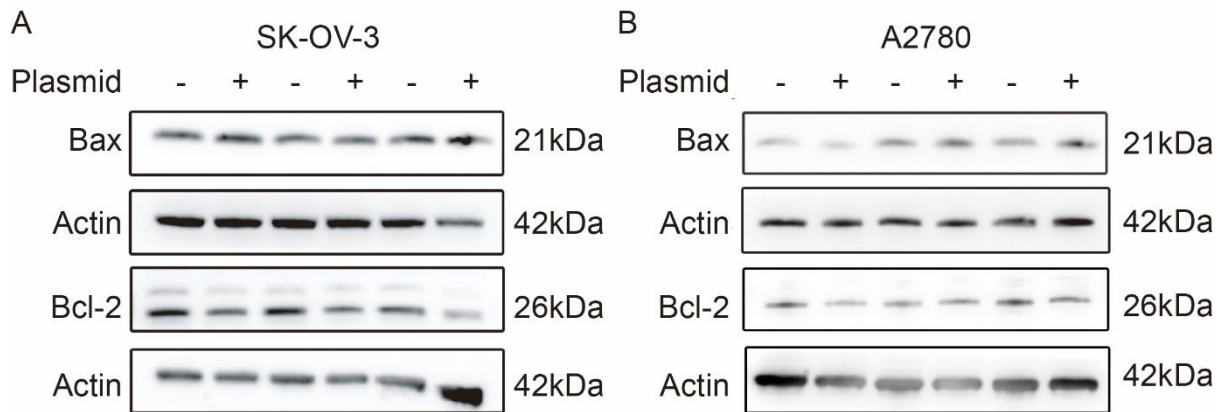

**FIGURE S6** | Detection of Bax and Bcl-2 proteins by Western blot. (A-B) SK-OV-3 cells and A2780 cells were transfected with CROT-overexpressing plasmid (oe-CROT) for 48 h.

Figure S7

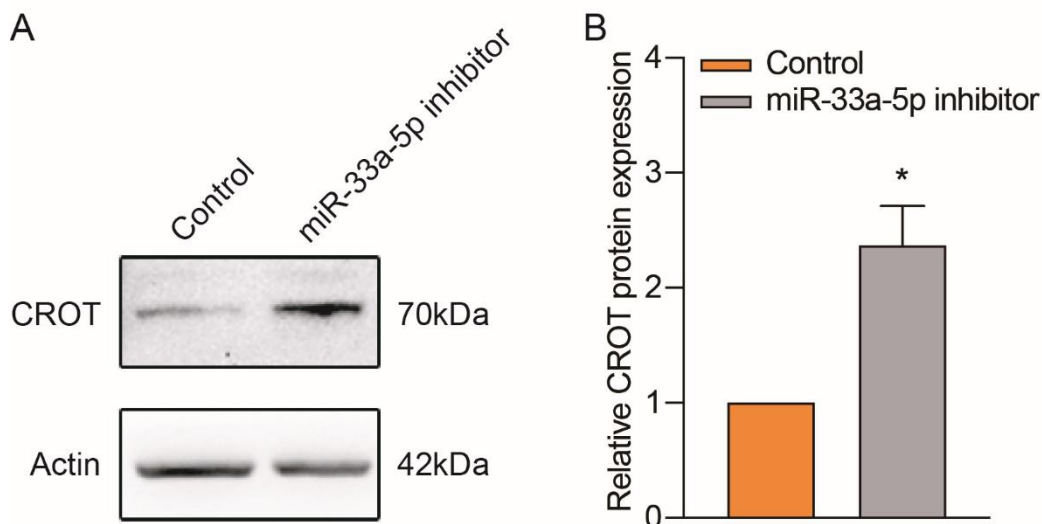

**FIGURE S7** | Detection of CROT protein in SK-OV-3 cells. (A) Protein was detected by Western blot after the treatment of miR-33a-5p inhibitors for 48 h. (B) The histogram shows the densitometric analyses of protein bands in A (n=3). Data were presented as mean  $\pm$  SEM. \*,  $P < 0.05$ .

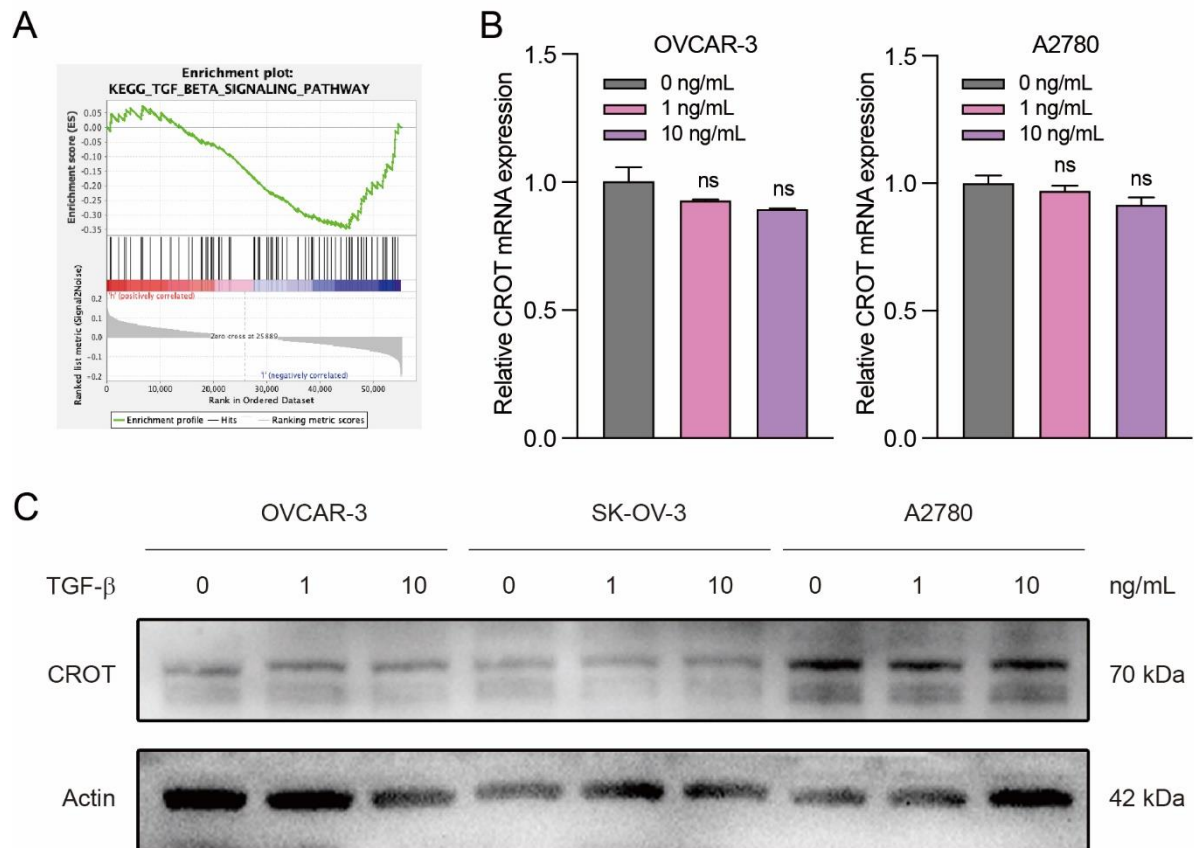

**FIGURE S8** | Effect of TGF- $\beta$  on CROT expression. **(A)** GSEA analysis of the association between the enrichment of the TGF- $\beta$  signaling pathway and CROT expression based on the data from the TCGA-OV database. **(B-C)** Detection of CROT mRNA and protein expression in OVCAR-3 and A2780 cells after the administration of TGF- $\beta$ 1 (0, 1, or 10 ng/ml) by qRT-PCR and Western blot. Data were presented as mean  $\pm$  SEM. GSEA, gene set enrichment analysis; ns, not significant.
