# Supplementary material for: The miR-33a-5p/CROT axis mediates ovarian cancer cell behaviors and chemoresistance via the regulation of the TGF-β signal pathway
Source: PubMed Central journal article supplement (PMC9478117; doi:10.3389/fendo.2022.950345), 2022-09-02
Supplement: Table_1.pdf [file Table_1.pdf]

## SUPPLEMENTARY TABLES:

**Table S1.** Sequences of siRNA and miRNA

| Items                 | Sequences               | Position  |
|-----------------------|-------------------------|-----------|
| siRNA                 |                         |           |
| CROT-siRNA-1          | GCCUGUUCAUAAAGUUGGAAAtt | 648-668   |
| CROT-siRNA-2          | CCAUCCUUAUUGGAGAUCCAAtt | 1102-1123 |
| NC-siRNA              | UUCUCCGAACGUCGUCAGUtt   | Scramble  |
| miRNA                 |                         |           |
| miR-33a-5p mimics     | GUGCAUUGUAGUUGCAUUGCA   |           |
| NC-mimics             | UUGUACUACACAAAAGUACUG   | Scramble  |
| miR-33a-5p inhibitors | UGCAAUGCAACUACAAUGCAC   |           |
| NC-inhibitors         | CAGUACUUUUGUGUAGUACAA   | Scramble  |

GenBank accession number of CROT: NM\_021151.4. NC, non-specific control.

**Table S2.** Sequences of RT-PCR primers

| Genes         | Sequences                                               |
|---------------|---------------------------------------------------------|
| miR-33a-5p-RT | GTCGTATCCAGTGCAGGGTCCGAGGTATTTCGCACTGG<br>ATACGACTgcaat |
| miR-33a-5p-F  | GUGCAUUGUAGUUGCAUUGCA                                   |
| miR-33a-5p-R  | GGGCCTATTTCCCATGATTC                                    |
| U6-F          | GCTTCGGCAGCACATATACT                                    |
| U6-R          | GGGCCTATTTCCCATGATTC                                    |
| CROT-F        | GTGGTGGCTGAATGTTGCCTA                                   |
| CROT-R        | TTGGAGGCCAGTAGTGTTCAA                                   |
| Actin-F       | TCATCACCATTGGCAATGAG                                    |
| Actin-R       | CACTGTGTTGGCGTACAGGT                                    |

F, forward primer; R, reverse primer.

**Table S3.** Information of the GEO datasets involved in this analysis

| GEO series | Contributors, Year | EOC (n) | Normal (n) | GEO Platform # |
|------------|--------------------|---------|------------|----------------|
| GSE26712   | Birrer MJ, 2011    | 185     | 10         | GPL96          |
| GSE18521   | Mok SC etc, 2009   | 53      | 10         | GPL570         |
| GSE40595   | Birrer MJ, 2014    | 32      | 6          | GPL570         |
| GSE38666   | Lili LN etc, 2012  | 18      | 12         | GPL570         |
| GSE14407   | Bowen NJ etc, 2009 | 12      | 12         | GPL570         |
| GSE52460   | Hill CG etc, 2013  | 10      | 10         | GPL570         |

Samples used for the analysis of CROT expression were extracted from different GEO datasets. EOC, epithelial ovarian cancer; GEO, Gene Expression Omnibus; GPL, GEO Platform; n, number of samples; Normal, normal epithelial tissue of the ovary; n, number of samples.
